# Supplementary material for: Pediatric obesity is associated with an altered gut microbiota and discordant shifts in F irmicutes populations
Source: PubMed Central journal article supplement (PMC5516186; doi:10.1111/1462-2920.13463), 2016-08-22
Supplement: EMI-19-95-s001.pdf [file EMI-19-95-s001.pdf]

SUPPLEMENTAL FIGURES AND TABLES

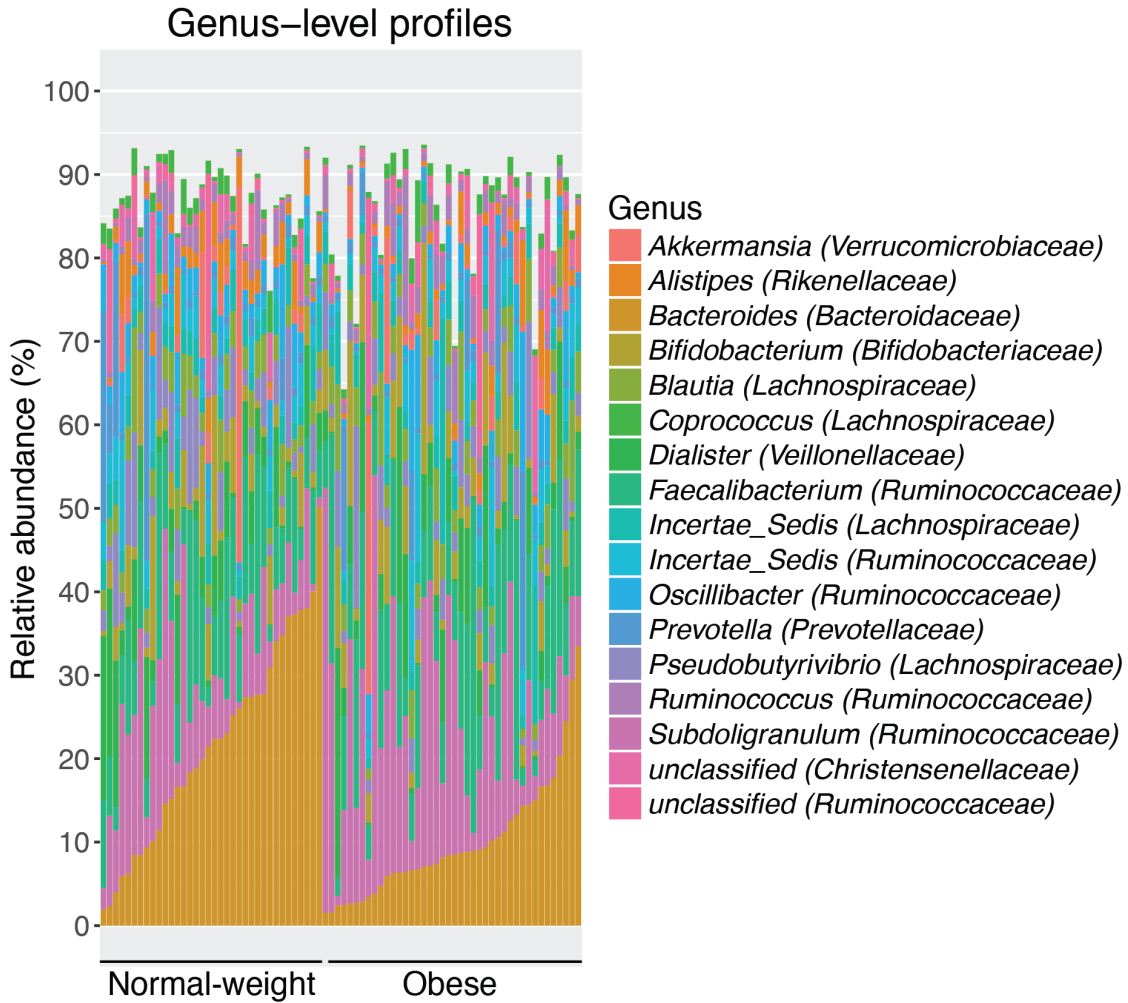

**Figure S1. Abundant bacterial taxa in stool samples of normal-weight (n=36) and obese (n=42) children.** Genus level taxon profiles are shown. Abundant taxa, defined as having a mean relative abundance of >1%, are shown.

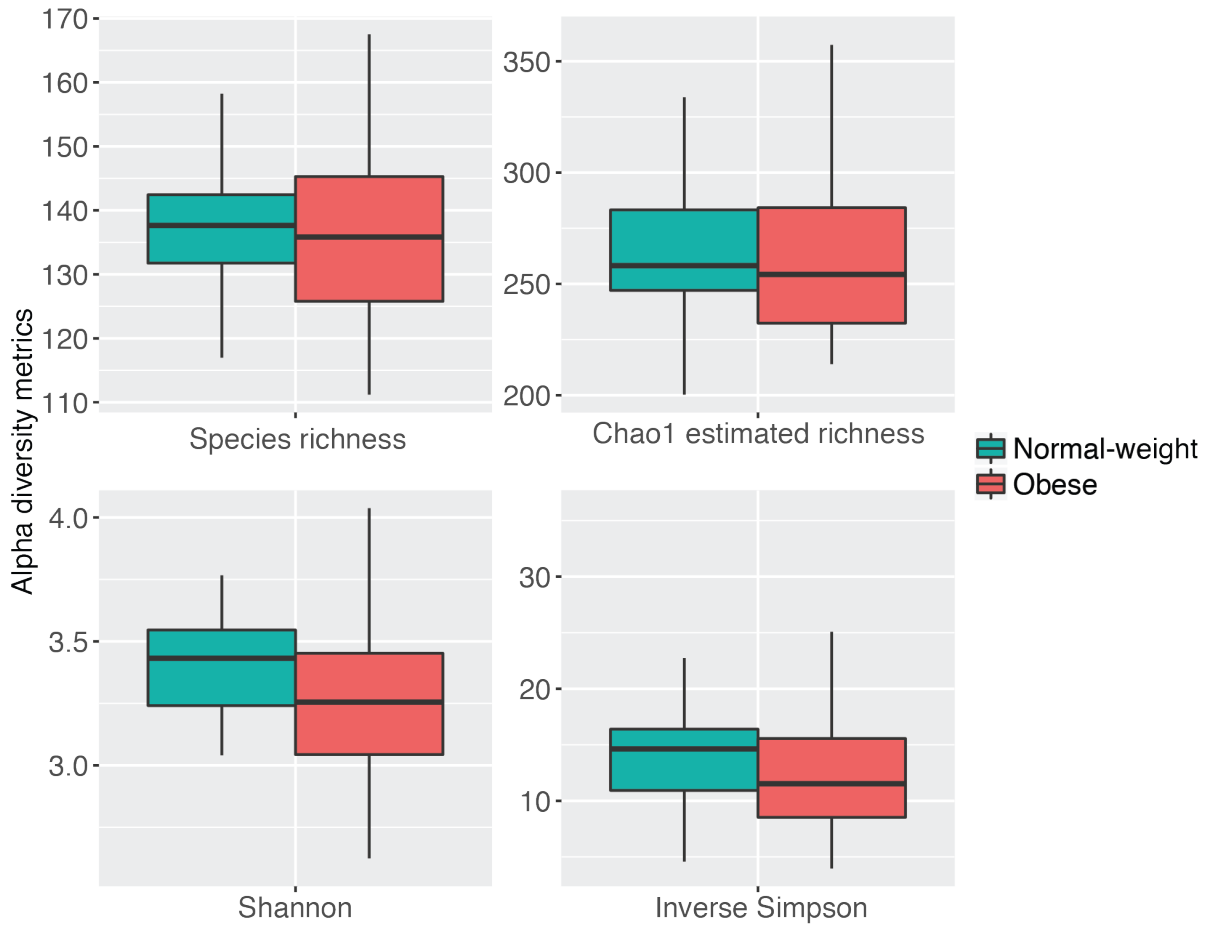

**Figure S2. Intestinal microbiota richness and diversity in normal-weight and obese children.**

Observed species, Chao1 estimated richness, Shannon diversity, and inverse Simpson diversity estimators show no significant difference between the two groups (Observed species:  $p=0.59$ ; Chao1:  $p=0.98$ ; Shannon:  $p=0.065$ ; Inverse Simpson  $p=0.34$ ).

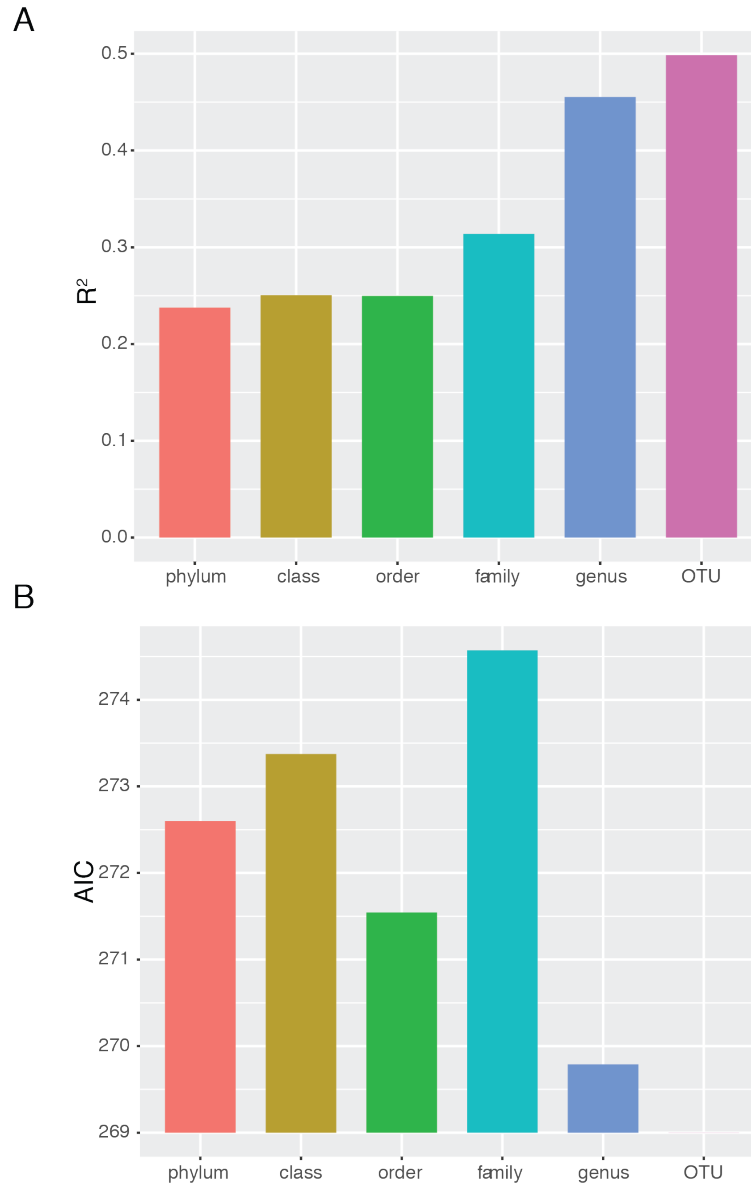

**Figure S3. Generalized linear regression models at different taxonomic levels.** (A) The coefficient of determination ( $R^2$ ), which indicates the proportion of the variance in the dependent variable that is predictable from the independent variable, increases at genus and OTU levels. (B) The Akaike information criterion (AIC), a measure of the relative quality of statistical models for a given set of data, is lowest at genus and OTU levels.

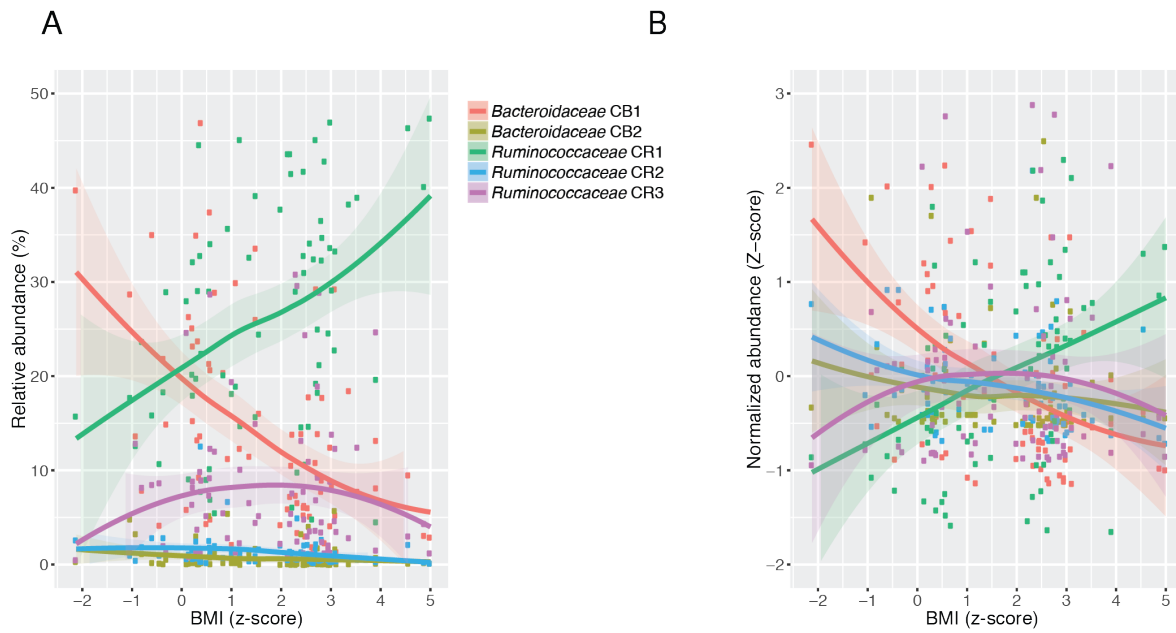

**Figure S4: Correlating communities of *Bacteroidaceae* (CB) and *Ruminococcaceae* (CR) and their abundances with respect to BMI z-score.** Relative abundances (A) and z-score transformed abundances (B) are shown. Data points were processed using Lowess smoothing and 95% confidence intervals are shown.

**Table S1. Characteristics of the study cohort.** The cohort was composed of normal-weight (N) and obese (O) children. Body mass index (BMI) was calculated as weight/height<sup>2</sup> (kg/m<sup>2</sup>), and was transformed to age- and sex-adjusted z-scores. Values are expressed as mean ± sd.

<sup>a</sup>Information not available for two subjects. <sup>b</sup>Information not available for three subjects.

|                                       | N (n=36) | O (n=42)           |
|---------------------------------------|----------|--------------------|
| Age (years)                           | 11±0.33  | 11±1.99            |
| Sex (male:female)                     | 17:19    | 21:21              |
| BMI z-score                           | 0.3±0.82 | 3.0±0.7            |
| Delivery type (vaginal: caesarean)    | 28:8     | 22:18 <sup>a</sup> |
| Infant diet (breast-fed: formula-fed) | 14:22    | 18:21 <sup>b</sup> |

**Table S2. Short chain fatty acid (SCFA) levels in the stool of normal-weight (N) and obese (O) subjects.** Concentrations are calculated as  $\mu\text{mol/g}$  wet weight and are expressed as mean  $\pm$  sd. Total SCFA is calculated as the sum of acetate, propionate, and butyrate concentrations.

|            | N (n=36)        | O (n=42)        | p-value |
|------------|-----------------|-----------------|---------|
| Acetate    | 30.3 $\pm$ 13.0 | 40.4 $\pm$ 18.9 | 0.0081  |
| Propionate | 8.8 $\pm$ 5.8   | 12.5 $\pm$ 7.7  | 0.0206  |
| Butyrate   | 8.4 $\pm$ 5.3   | 12.4 $\pm$ 9.8  | 0.0272  |
| Total SCFA | 47.5 $\pm$ 20.4 | 65.3 $\pm$ 32.4 | 0.0049  |

**Table S3. Daily caloric and dietary intake in obese and normal-weight children.** Values are expressed as mean  $\pm$  sd.

| <b>Variable</b>       | <b>Obese children</b> | <b>Normal-weight children</b> | <b><i>p</i>-value</b> | <b><i>p</i>-value<sup>†</sup></b> |
|-----------------------|-----------------------|-------------------------------|-----------------------|-----------------------------------|
| Calories (kcal/day)   | 2264.13 (746.31)      | 1722.01 (383.78)              | 0.001 *               | 0.001*                            |
| Protein (g/day)       | 94.00 (32.76)         | 68.56 (19.47)                 | <0.001 *              | 0.001*                            |
| Carbohydrates (g/day) | 301.06 (120.66)       | 201.94 (47.66)                | <0.001 *              | 0.001*                            |
| Sugars (g/day)        | 110.16 (65.70)        | 75.12 (31.92)                 | 0.005 *               | 0.012*                            |
| Fats (g/day)          | 82.38 (30.80)         | 70.02 (18.36)                 | 0.128                 | 0.033*                            |

<sup>†</sup> Adjusted for age and sex. \*Statistically significant

**Table S4. The relative abundance of abundant bacteria taxa in the study.** Abundant taxa are defined as having a mean abundance greater than 1%. \* Taxa significantly increased or decreased in obese children (complete details are presented in Table S4).

| Taxonomic level | Taxon                      | Normal-weight |      | Obese |      |
|-----------------|----------------------------|---------------|------|-------|------|
|                 |                            | Mean          | sd   | Mean  | sd   |
| Phylum          | <i>Bacteroidetes</i> *     | 30            | 12.6 | 16.6  | 11.8 |
|                 | <i>Firmicutes</i> *        | 60.9          | 14.1 | 72.1  | 12.1 |
|                 | <i>Actinobacteria</i>      | 5.6           | 6.1  | 6.3   | 4.9  |
|                 | <i>Verrucomicrobia</i>     | 2.5           | 7.6  | 2.3   | 5.5  |
|                 | <i>Proteobacteria</i>      | 1.2           | 1.1  | 2.0   | 2.9  |
| Family          | <i>Ruminococcaceae</i> *   | 33.3          | 11.5 | 42.5  | 12.7 |
|                 | <i>Lachnospiraceae</i>     | 16.4          | 6.5  | 17.9  | 9.7  |
|                 | <i>Bacteroidaceae</i> *    | 21.4          | 12.2 | 10    | 7.1  |
|                 | <i>Veillonellaceae</i>     | 6.1           | 5.7  | 6.5   | 7.5  |
|                 | <i>Bifidobacteriaceae</i>  | 5.1           | 6.0  | 5.3   | 4.5  |
|                 | <i>Prevotellaceae</i>      | 3.6           | 8.5  | 2.8   | 5.2  |
|                 | <i>Verrucomicrobiaceae</i> | 2.5           | 7.6  | 2.3   | 5.5  |
|                 | <i>Rikenellaceae</i>       | 2.8           | 2.0  | 2.0   | 2.6  |
| Genus           | <i>Christensenellaceae</i> | 2.0           | 2.3  | 2.3   | 3.7  |
|                 | <i>Bacteroides</i> *       | 21.4          | 12.2 | 10.5  | 7.1  |
|                 | <i>Subdoligranulum</i>     | 10.7          | 8.4  | 16.7  | 12.3 |
|                 | <i>Faecalibacterium</i>    | 10.0          | 6.3  | 12.7  | 8.7  |
|                 | <i>Dialister</i>           | 5.9           | 5.8  | 5.6   | 7.1  |
|                 | <i>Bifidobacterium</i>     | 5.1           | 6.0  | 5.3   | 4.5  |
|                 | <i>Pseudobutyrvibrio</i>   | 5.1           | 4.1  | 4.4   | 3.9  |
| <i>Blautia</i>  | 3.6                        | 1.8           | 4.4  | 2.4   |      |



**Table S5.** Taxa that were increased (+) or decreased (-) in abundance in obese children (O).

| <b>Taxonomic level</b> | <b>Taxon</b>                          | <b>O</b> | <b>p-value</b> |
|------------------------|---------------------------------------|----------|----------------|
| Phylum                 | <i>Firmicutes</i>                     | +        | 0.001          |
|                        | <i>Bacteroidetes</i>                  | -        | <0.0001        |
| Class                  | <i>Clostridia</i>                     | +        | 0.004          |
|                        | <i>Bacteroidia</i>                    | -        | <0.0001        |
| Order                  | <i>Clostridiales</i>                  | +        | 0.003          |
|                        | <i>Bacteroidales</i>                  | -        | <0.0001        |
| Family                 | <i>Ruminococcaceae</i>                | +        | 0.01           |
|                        | <i>Bacteroidaceae</i>                 | -        | <0.0001        |
| Genus                  | <i>Bacteroides</i>                    | -        | <0.0001        |
| OTU                    | OTU 7:<br><i>Bacteroides vulgatus</i> | -        | <0.0001        |

**Table S6. Correlation of alpha diversity metrics with BMI z-score and SCFAs.** Observed OTUs, Chao1 estimated richness, Shannon and inverse Simpson diversity indexes were correlated and the Pearson correlation coefficients (r) and respective p-values are shown. \* indicates  $p \leq 0.05$  and \*\* indicates  $p \leq 0.01$ .

|             | Observed OTUs |          | Chao1 richness |          | Shannon |          | Inverse Simpson |           |
|-------------|---------------|----------|----------------|----------|---------|----------|-----------------|-----------|
|             | r             | p-value  | r              | p-value  | r       | p-value  | r               | p-value   |
| BMI z-score | -0.1562       | 0.1720   | -0.0240        | 0.8345   | -0.2657 | 0.0186*  | -0.1946         | 0.0877    |
| Acetate     | -0.2956       | 0.0085** | -0.2826        | 0.0121*  | -0.3513 | 0.0016** | -0.3581         | 0.0012 ** |
| Propionate  | -0.1876       | 0.1000   | -0.2166        | 0.0567   | -0.2584 | 0.0223*  | -0.2575         | 0.0227*   |
| Butyrate    | -0.2387       | 0.0353*  | -0.2701        | 0.0167*  | -0.2639 | 0.0195*  | -0.2354         | 0.0379*   |
| Total SCFA  | -0.2917       | 0.0095** | -0.3003        | 0.0075** | -0.3498 | 0.0016** | -0.3454         | 0.0019**  |

**Table S7. Taxa correlated with acetate concentration.** The Pearson correlation coefficients (r) and respective p-values are shown.

| <b>Taxonomic level</b> | <b>Taxon</b>                                       | <b>r</b> | <b>p-value</b> |
|------------------------|----------------------------------------------------|----------|----------------|
| Phylum                 | <i>Firmicutes</i>                                  | 0.3107   | 0.005          |
|                        | <i>Bacteroidetes</i>                               | -0.3145  | 0.005          |
| Class                  | <i>Clostridia</i>                                  | 0.2765   | 0.01           |
|                        | <i>Bacteroidia</i>                                 | -0.3145  | 0.005          |
| Order                  | <i>Clostridiales</i>                               | 0.2767   | 0.01           |
|                        | <i>Bacteroidales</i>                               | -0.3145  | 0.005          |
| Family                 | <i>Ruminococcaceae</i>                             | 0.3120   | 0.005          |
|                        | <i>Bacteroidaceae</i>                              | -0.2876  | 0.01           |
|                        | <i>Porphyromonadaceae</i>                          | -0.2845  | 0.01           |
|                        | <i>Rikenellaceae</i>                               | -0.3107  | 0.005          |
| Genus                  | <i>Ruminococcaceae Incertae sedis (Firmicutes)</i> | -0.2683  | 0.01           |
|                        | <i>Bacteroides (Bacteroidetes)</i>                 | -0.2876  | 0.01           |
|                        | <i>Parabacteroides (Bacteroidetes)</i>             | -0.2737  | 0.01           |
|                        | <i>Alistipes (Bacteroidetes)</i>                   | -0.3117  | 0.005          |
|                        | <i>Oscillabacter (Firmicutes)</i>                  | -0.3205  | 0.004          |
|                        | <i>Subdoligranulum (Firmicutes)</i>                | 0.2737   | 0.01           |
|                        | <i>Faecalibacterium (Firmicutes)</i>               | 0.4487   | <0.0001        |
| OTU                    | OTU 3: <i>Faecalibacterium prausnitzii</i>         | 0.4487   | <0.0001        |

**Table S8. Properties of correlation networks generated from samples from normal-weight (N) or obese children (O).** Nodes are OTUs and edges are significant correlations between OTUs. Other parameters are metrics related to the topology of the network.

|                                                        | <b>N</b> | <b>O</b> |
|--------------------------------------------------------|----------|----------|
| Nodes                                                  | 138      | 143      |
| Edges                                                  | 370      | 941      |
| Mean Degree                                            | 5.36     | 13.16    |
| Transitivity                                           | 0.047    | 0.131    |
| Average Path Length                                    | 3.10     | 2.22     |
| Assortativity                                          | -0.0535  | 0.169    |
| Fragmentation                                          | 0        | 0        |
| Betweenness Centrality                                 | 0.0701   | 0.0226   |
| Closeness Centrality                                   | 0.00123  | 0.00137  |
| Percent Positive corr. in network                      | 69.5     | 65.5     |
| <i>Bacteroidaceae</i> (intra-family corr.; pos./neg.)  | [2/0]    | [13/0]   |
| <i>Ruminococcaceae</i> (intra-family corr.; pos./neg.) | [31/5]   | [50/18]  |

**Table S9:** Clusters of correlating *Bacteroidaceae* and *Ruminococcaceae* OTUs extracted from the correlation network. The closest cultured species and its similarity to each OTU (% sequence similarity) are shown.

| <i>Bacteroidaceae</i>  |                           |                                     |                                  |    |
|------------------------|---------------------------|-------------------------------------|----------------------------------|----|
| Correlating community  | OTU_ID                    | Closest related species             | Similarity (%)                   |    |
| CB1                    | OTU_7                     | <i>Bacteroides vulgatus</i>         | 100                              |    |
|                        | OTU_60                    | <i>Bacteroides fragilis</i>         | 100                              |    |
|                        | OTU_13                    | <i>Bacteroides caccae</i>           | 100                              |    |
|                        | OTU_51                    | <i>Bacteroides thetaiotaomicron</i> | 100                              |    |
|                        | OTU_49                    | <i>Bacteroides stercoris</i>        | 99                               |    |
|                        | OTU_119                   | <i>Bacteroides cellulosilyticus</i> | 100                              |    |
|                        | OTU_9                     | <i>Bacteroides uniformis</i>        | 100                              |    |
|                        | OTU_207                   | <i>Bacteroides xyloxylophilus</i>   | 99                               |    |
|                        | CB2                       | OTU_312                             | <i>Bacteroides eggerthii</i>     | 99 |
|                        |                           | OTU_65                              | <i>Bacteroides finegoldii</i>    | 95 |
| <i>Ruminococcaceae</i> |                           |                                     |                                  |    |
| Correlating community  | OTU_ID                    | Closest related species             | Similarity (%)                   |    |
| CR1                    | OTU_118                   | <i>Clostridium leptum</i>           | 92                               |    |
|                        | OTU_1                     | <i>Faecalibacterium prausnitzii</i> | 100                              |    |
|                        | OTU_479                   | <i>Faecalibacterium prausnitzii</i> | 97                               |    |
|                        | OTU_122                   | <i>Ruminococcus callidus</i>        | 99                               |    |
|                        | OTU_4                     | <i>Gemmiger formicilis</i>          | 100                              |    |
|                        | OTU_48                    | <i>Ruminococcus bicirculans</i>     | 100                              |    |
|                        | OTU_68                    | <i>Clostridium leptum</i>           | 95                               |    |
|                        | OTU_87                    | <i>Clostridium methylpentosum</i>   | 90                               |    |
|                        | OTU_127                   | <i>Ruminococcus flavefaciens</i>    | 95                               |    |
|                        | OTU_22                    | <i>Ruminococcus bromii</i>          | 98                               |    |
|                        | OTU_3                     | <i>Faecalibacterium prausnitzii</i> | 100                              |    |
|                        | CR2                       | OTU_58                              | <i>Clostridium papyrosolvens</i> | 87 |
|                        |                           | OTU_38                              | <i>Gemmiger formicilis</i>       | 94 |
|                        |                           | OTU_96                              | <i>Ruminococcus bromii</i>       | 90 |
| OTU_63                 |                           | <i>Clostridium thermocellum</i>     | 89                               |    |
| OTU_78                 |                           | <i>Ruminococcus bromii</i>          | 86                               |    |
| OTU_53                 |                           | <i>Ruminococcus champanellensis</i> | 90                               |    |
| OTU_164                |                           | <i>Clostridium methylpentosum</i>   | 94                               |    |
| OTU_67                 | <i>Clostridium leptum</i> | 100                                 |                                  |    |
| CR3                    | OTU_37                    | <i>Ruminococcus lactaris</i>        | 95                               |    |

|  |         |                                     |    |
|--|---------|-------------------------------------|----|
|  | OTU_33  | <i>Clostridium thermocellum</i>     | 90 |
|  | OTU_93  | <i>Clostridium papyrosolvans</i>    | 88 |
|  | OTU_15  | <i>Clostridium viride</i>           | 90 |
|  | OTU_23  | <i>Ruminococcus bicirculans</i>     | 87 |
|  | OTU_17  | <i>Ruminococcus bromii</i>          | 88 |
|  | OTU_44  | <i>Clostridium viride</i>           | 90 |
|  | OTU_461 | <i>Clostridium viride</i>           | 92 |
|  | OTU_168 | <i>Ruminococcus flavefaciens</i>    | 91 |
|  | OTU_81  | <i>Clostridium thermocellum</i>     | 88 |
|  | OTU_103 | <i>Ruminococcus albus</i>           | 90 |
|  | OTU_29  | <i>Clostridium viride</i>           | 92 |
|  | OTU_155 | <i>Ruminococcus albus</i>           | 91 |
|  | OTU_110 | <i>Clostridium thermocellum</i>     | 90 |
|  | OTU_83  | <i>Ruminococcus albus</i>           | 90 |
|  | OTU_8   | <i>Ruminococcus bicirculans</i>     | 91 |
|  | OTU_108 | <i>Faecalibacterium prausnitzii</i> | 93 |
|  | OTU_86  | <i>Ruminococcus champanellensis</i> | 85 |
|  | OTU_10  | <i>Clostridium viride</i>           | 91 |
|  | OTU_181 | <i>Clostridium viride</i>           | 89 |
